# Supplementary material for: Serial Cardiac Magnetic Resonance Imaging in Patients with Mitral Valve Prolapse—A Single-Center Retrospective Registry
Source: MDPI journal article supplement (doi:10.3390/jcm13092669), 2024-05-02

**Figure S1.** Bland-Altman analysis for intra- and interobserver variability of LGE measurement.

**A. Intra-observer variability**

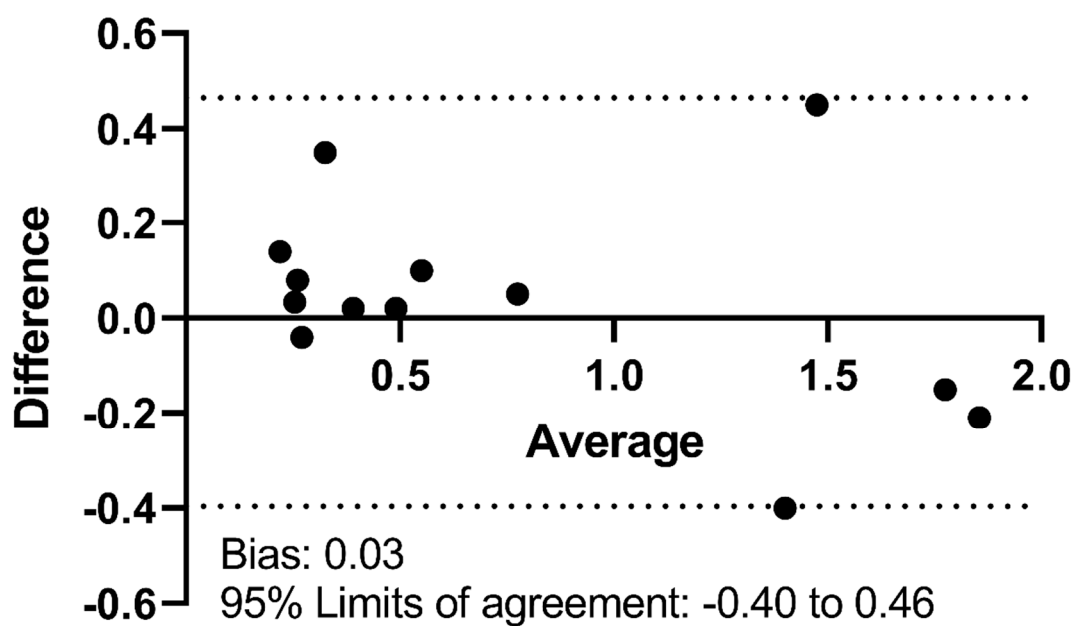

**B. Interobserver variability**

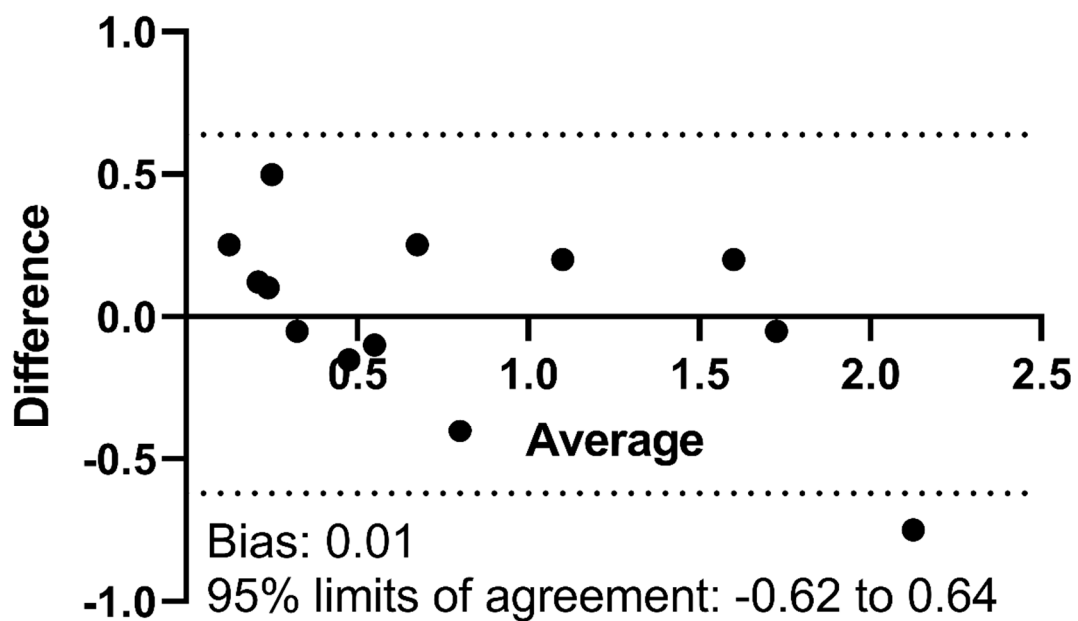

**Table S1.** Comparison of patients with 1 CMR and those with >1 CMR included in this analysis.

| Variable                                  | All patients<br>(N=169) | Single CMR<br>(N=157) | Serial CMR<br>(N=12)  | p-value |
|-------------------------------------------|-------------------------|-----------------------|-----------------------|---------|
| Age – first cardiac contact (y)           | 44.3 (29.8 – 56.9)      | 46.0 (30.8 – 58.1)    | 34.0 (20.2 – 45.7)    | 0.052   |
| Age – CMR (y)                             | 51.4 (36.5 – 62.4)      | 51.5 (35.7 – 63.0)    | 43.8 (33.3 – 56.8)    | 0.177   |
| Follow-up since first cardiac contact (y) | 7.9 (3.8 – 15.7)        | 7.8 (3.7 – 15.2)      | 14.4 (8.2 – 20.8)     | 0.019   |
| Male                                      | 88 (52.1%)              | 85 (54.1%)            | 3 (25.0%)             | 0.072   |
| BMI (kg/m <sup>2</sup> )                  | 22.8 (20.6 – 24.9)      | 22.8 (20.6 – 24.9)    | 23.5 (20.2 – 25.2)    | 0.770   |
| Arterial hypertension                     | 27 (16.0%)              | 25 (15.9%)            | 2 (16.7%)             | 1.000   |
| Dyslipidemia                              | 52 (30.8%)              | 50 (31.8%)            | 2 (16.7%)             | 0.347   |
| Active smoking                            | 35 (20.7%)              | 34 (21.7%)            | 1 (8.3%)              | 0.463   |
| Heart failure                             | 13 (7.7%)               | 10 (6.4%)             | 3 (27.3%)             | 0.042   |
| Marfan                                    | 18 (10.7%)              | 17 (10.8%)            | 1 (8.3%)              | 1.000   |
| Familial SCD                              | 22 (13.0%)              | 19 (12.1%)            | 3 (25.0%)             | 0.193   |
| Familial MVP                              | 15 (8.9%)               | 13 (8.3%)             | 2 (16.7%)             | 0.289   |
| Palpitations                              | 115 (68.0%)             | 106 (67.5%)           | 9 (75.0%)             | 0.754   |
| Syncope                                   | 23 (13.6%)              | 22 (14.0%)            | 1 (8.3%)              | 1.000   |
| SCD                                       | 4 (2.4%)                | 4 (2.5%)              | 0 (0.0%)              | 1.000   |
| Beta-blocker                              | 85 (50.6%)              | 76 (48.4%)            | 9 (81.8%)             | 0.057   |
| Non-dihydropyridine CCB                   | 7 (4.2%)                | 7 (4.5%)              | 0 (0.0%)              | 1.000   |
| Anti-arrhythmic drugs                     |                         |                       |                       |         |
| Sotalol                                   | 4 (2.4%)                | 3 (1.9%)              | 1 (8.3%)              | 0.257   |
| Class Ic                                  | 10 (5.9%)               | 9 (5.7%)              | 1 (8.3%)              | 0.531   |
| Amiodarone                                | 2 (1.2%)                | 2 (1.3%)              | 0 (0.0%)              | 1.000   |
| ACE/ARB/ARNI                              | 32 (19.0%)              | 28 (17.8%)            | 4 (36.4%)             | 0.224   |
| Barlow's disease                          | 56 (33.3%)              | 51 (32.5%)            | 5 (45.4%)             | 0.509   |
| Heart rate (bpm)                          | 65.0 (57.0 – 78.0)      | 65.0 (58.0 – 78.0)    | 65.0 (55.3 – 73.3)    | 0.481   |
| PR interval (ms)                          | 158.0 (140.0 – 178.0)   | 158.0 (141.0 – 178.0) | 145.0 (136.5 – 182.0) | 0.447   |
| QRS duration (ms)                         | 94.0 (86.0 – 103.0)     | 94.0 (86.0 – 104.0)   | 97.0 (88.0 – 102.0)   | 0.486   |
| QTc duration (ms)                         | 413.0 (403.0 – 426.0)   | 413.0 (402.0 – 426.0) | 421.0 (403.3 – 433.0) | 0.419   |
| PVC on any ECG                            | 68 (41.5%)              | 59 (38.8%)            | 9 (75.0%)             | 0.029   |
| nsVT on any ECG                           | 3 (1.8%)                | 3 (2.0%)              | 0 (0.0%)              | 1.000   |
| Fragmented QRS                            | 24 (14.6%)              | 23 (15.1%)            | 1 (8.3%)              | 1.000   |
| Inferior TWI                              | 61 (36.1%)              | 54 (34.4%)            | 7 (58.3%)             | 0.122   |

Continuous variables are presented as median with quartiles 1 and 3.

Abbreviations: ACE/ARB/ARNI: angiotensin-converting enzyme inhibitor / angiotensin receptor blocker / angiotensin receptor-neprilysin inhibitor; BMI: body mass index; bpm: beats per minute; CCB: calcium channel blocker; CMR: cardiac magnetic resonance imaging; ECG: electrocardiogram; ms: milliseconds; MVP: mitral valve prolapse; nsVT: non-sustained ventricular tachycardia; PVC: premature ventricular complex; SCD: sudden cardiac death; TWI: T-wave inversion; y: year.

**Figure S2.** Example 2 of new LGE on serial CMR in a patient without surgical intervention.

- A. Short-axis view on the baseline CMR at the level of the PM shows LGE in the posterior papillary muscle (red arrow).
- B. Short-axis view at the same level approximately 6 years later shows LGE in the posterior papillary muscle (red arrow) and new subendocardial LGE in the inferolateral left ventricular wall (blue arrow).

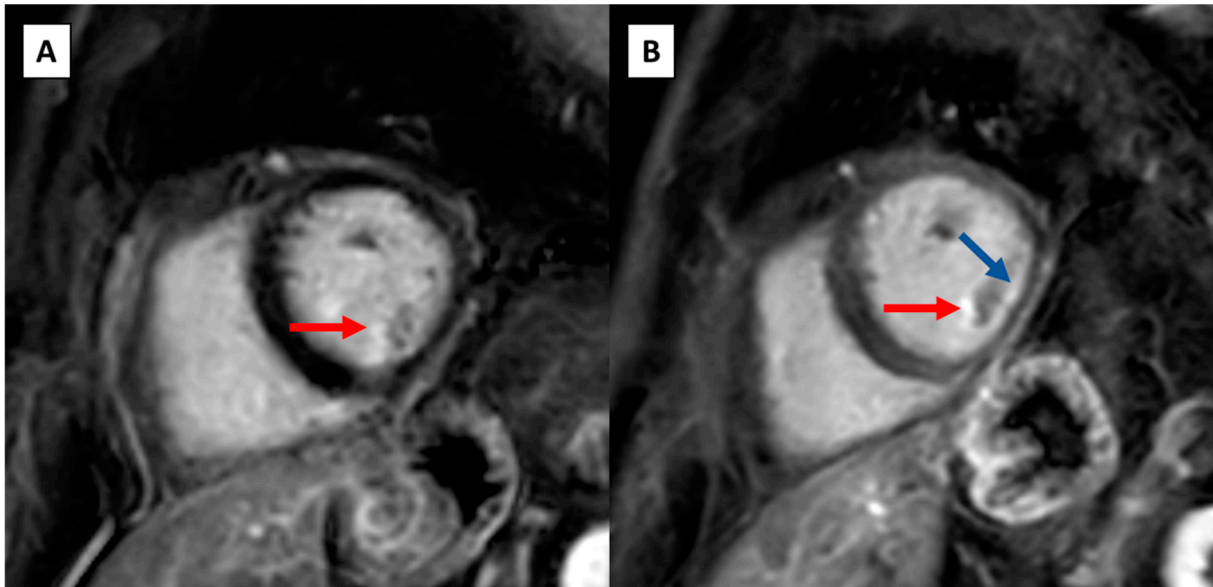

**Figure S3.** Change in LGE between baseline and follow-up CMR.

- A. Myocardial LGE in patients without surgical intervention.
- B. Myocardial LGE in patients with surgical intervention.
- C. Papillary muscle LGE in patients without surgical intervention.

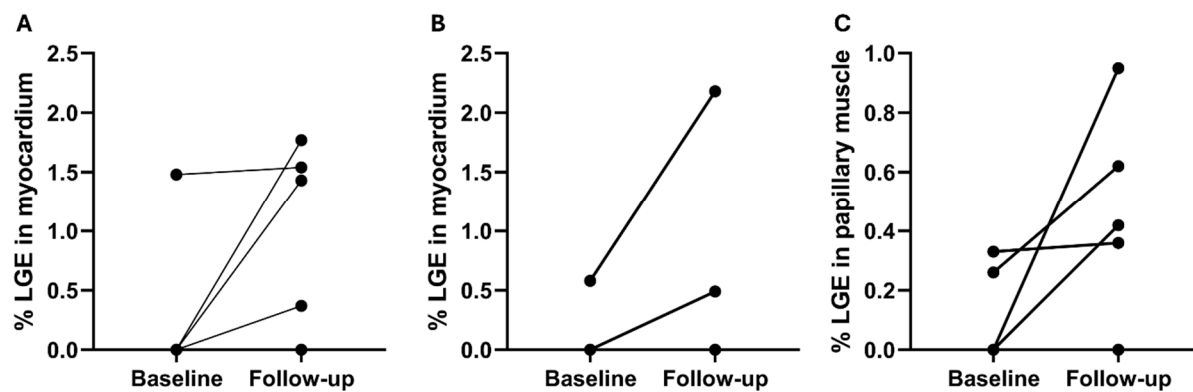

**Figure S4.** Example 2 of new LGE on serial CMR in a patient with surgical intervention.

- A. Short-axis view on the baseline CMR.
- B. Short-axis view at the same level shows new LGE in the basal inferolateral left ventricular wall (red arrow).

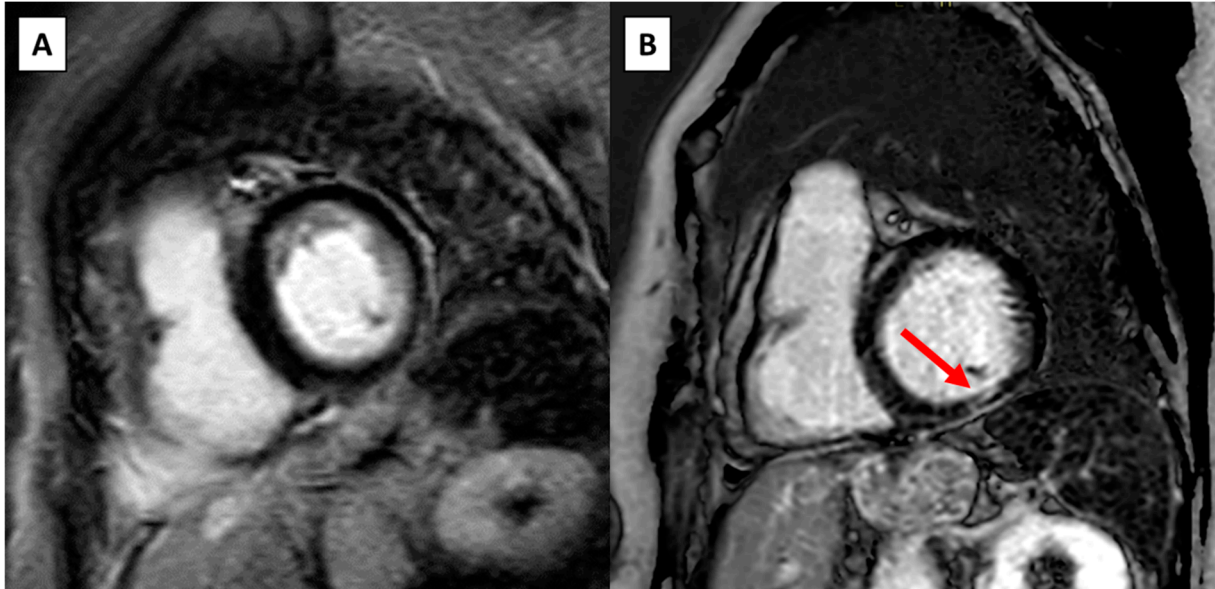

Supplement: s1 [file s1]
